# Supplementary material
Source: ML conference proceedings conference paper supplement (https://proceedings.neurips.cc/paper_files/paper/2013/hash/59c33016884a62116be975a9bb8257e3-Abstract.html)
Supplement: Supplementary file [file 59c33016884a62116be975a9bb8257e3-Supplemental.zip]

---

# It is all in the noise: Efficient multi-task Gaussian process inference with structured residuals

## Supplementary Material

---

**Barbara Rakitsch**

Machine Learning and Computational Biology  
Research Group  
Max Planck Institutes Tübingen, Germany  
rakitsch@tuebingen.mpg.de

**Christoph Lippert**

Microsoft Research  
Los Angeles, USA  
lippert@microsoft.com

**Karsten Borgwardt<sup>1,2</sup>**

Machine Learning and Computational Biology  
Research Group  
Max Planck Institutes Tübingen, Germany  
karsten.borgwardt@tuebingen.mpg.de

**Oliver Stegle<sup>2</sup>**

European Molecular Biology Laboratory  
European Bioinformatics Institute  
Cambridge, UK  
oliver.stegle@ebi.ac.uk

### 1 Kronecker Identities

Let  $\mathbf{A}$  be a  $m \times n$  matrix, and  $\mathbf{B}$  be a  $p \times q$  matrix. The Kronecker product  $\mathbf{A} \otimes \mathbf{B}$  is a  $mp \times nq$  matrix and defined as follows:

$$\mathbf{A} \otimes \mathbf{B} = \begin{pmatrix} A_{11}\mathbf{B} & \dots & A_{1n}\mathbf{B} \\ \vdots & \ddots & \vdots \\ A_{m1}\mathbf{B} & \dots & A_{mn}\mathbf{B} \end{pmatrix} \quad (1)$$

The following equalities hold [1]:

$$(\mathbf{A} \otimes \mathbf{B})(\mathbf{C} \otimes \mathbf{D}) = \mathbf{AC} \otimes \mathbf{BD} \quad (2)$$

$$(\mathbf{A} \otimes \mathbf{B})^\top = \mathbf{A}^\top \otimes \mathbf{B}^\top \quad (3)$$

$$(\mathbf{A} \otimes \mathbf{B})^{-1} = \mathbf{A}^{-1} \otimes \mathbf{B}^{-1} \quad (4)$$

$$|\mathbf{A} \otimes \mathbf{B}| = |\mathbf{A}|^p \cdot |\mathbf{B}|^n \quad (5)$$

$$(\mathbf{A} \otimes \mathbf{B}) \text{vec}(\mathbf{Y}) = \text{vec}(\mathbf{BYA}^\top) \quad (6)$$

Let  $\mathbf{U}_A \mathbf{S}_A \mathbf{U}_A^\top$  be the eigenvalue decomposition of  $\mathbf{A}$  and  $\mathbf{U}_B \mathbf{S}_B \mathbf{U}_B^\top$  the eigenvalue decomposition of  $\mathbf{B}$ , then

$$(\mathbf{U}_A \otimes \mathbf{U}_B) (\mathbf{S}_A \otimes \mathbf{S}_B + \sigma^2 \mathbf{I}) (\mathbf{U}_A^\top \otimes \mathbf{U}_B^\top) \quad (7)$$

is the eigenvalue decomposition of  $\mathbf{A} \otimes \mathbf{B} + \sigma^2 \mathbf{I}$ , where  $\sigma^2$  is a non-negative scalar.

### 1.1 Task Cancellation when the task covariance matrices are equal

For the special case  $\mathbf{C} = \mathbf{\Sigma}$ , the predictions become independent across tasks:

$$\begin{aligned}
\text{vec } \mathbf{M}^* &= (\mathbf{C} \otimes \mathbf{R}^*) (\mathbf{C} \otimes \mathbf{R} + \mathbf{\Sigma} \otimes \mathbf{I})^{-1} \text{vec } \mathbf{Y} \\
&= (\mathbf{C} \otimes \mathbf{R}^*) (\mathbf{C} \otimes \mathbf{R} + \mathbf{C} \otimes \mathbf{I})^{-1} \text{vec } \mathbf{Y} \\
&= (\mathbf{C} \otimes \mathbf{R}^*) (\mathbf{C} \otimes (\mathbf{R} + \mathbf{I}))^{-1} \text{vec } \mathbf{Y} \\
&= (\mathbf{C} \otimes \mathbf{R}^*) (\mathbf{C}^{-1} \otimes (\mathbf{R} + \mathbf{I})^{-1}) \text{vec } \mathbf{Y} \\
&= (\mathbf{C}\mathbf{C}^{-1} \otimes \mathbf{R}^*(\mathbf{R} + \mathbf{I})^{-1}) \text{vec } \mathbf{Y} \\
&= (\mathbf{I} \otimes \mathbf{R}^*(\mathbf{R} + \mathbf{I})^{-1}) \text{vec } \mathbf{Y} \\
&= \text{vec } (\mathbf{R}^*(\mathbf{R} + \mathbf{I})^{-1} \mathbf{Y})
\end{aligned} \tag{8}$$

For the noiseless case  $\mathbf{\Sigma} \rightarrow \mathbf{0}$ , a similar proof can be obtained [2].

## 2 Efficient inference in matrix-variate sum of Kronecker products Gaussian models

In the following, we will show how to efficiently evaluate the marginal likelihood and parameter gradients for matrix-variate normal models with a sum of two Kronecker products as covariance.

**Efficient likelihood evaluation** In a first step, we bring the covariance matrix in a more amenable form by factoring out the structured noise [3]:

$$\begin{aligned}
\mathbf{K} &= \mathbf{C} \otimes \mathbf{R} + \mathbf{\Sigma} \otimes \mathbf{\Omega} \\
&= \mathbf{C} \otimes \mathbf{R} + \mathbf{U}_{\Sigma} \mathbf{S}_{\Sigma} \mathbf{U}_{\Sigma}^{\top} \otimes \mathbf{U}_{\Omega} \mathbf{S}_{\Omega} \mathbf{U}_{\Omega}^{\top} \\
&= \left( \mathbf{U}_{\Sigma} \mathbf{S}_{\Sigma}^{\frac{1}{2}} \otimes \mathbf{U}_{\Omega} \mathbf{S}_{\Omega}^{\frac{1}{2}} \right) \left( \mathbf{S}_{\Sigma}^{-\frac{1}{2}} \mathbf{U}_{\Sigma}^{\top} \mathbf{C} \mathbf{U}_{\Sigma} \mathbf{S}_{\Sigma}^{-\frac{1}{2}} \otimes \mathbf{S}_{\Omega}^{-\frac{1}{2}} \mathbf{U}_{\Omega}^{\top} \mathbf{R} \mathbf{U}_{\Omega} \mathbf{S}_{\Omega}^{-\frac{1}{2}} + \mathbf{I} \otimes \mathbf{I} \right) \left( \mathbf{S}_{\Sigma}^{\frac{1}{2}} \mathbf{U}_{\Sigma}^{\top} \otimes \mathbf{S}_{\Omega}^{\frac{1}{2}} \mathbf{U}_{\Omega}^{\top} \right) \\
&= \left( \mathbf{U}_{\Sigma} \mathbf{S}_{\Sigma}^{\frac{1}{2}} \otimes \mathbf{U}_{\Omega} \mathbf{S}_{\Omega}^{\frac{1}{2}} \right) \left( \tilde{\mathbf{C}} \otimes \tilde{\mathbf{R}} + \mathbf{I} \otimes \mathbf{I} \right) \left( \mathbf{S}_{\Sigma}^{\frac{1}{2}} \mathbf{U}_{\Sigma}^{\top} \otimes \mathbf{S}_{\Omega}^{\frac{1}{2}} \mathbf{U}_{\Omega}^{\top} \right) \\
&= \left( \mathbf{U}_{\Sigma} \mathbf{S}_{\Sigma}^{\frac{1}{2}} \otimes \mathbf{U}_{\Omega} \mathbf{S}_{\Omega}^{\frac{1}{2}} \right) \tilde{\mathbf{K}} \left( \mathbf{S}_{\Sigma}^{\frac{1}{2}} \mathbf{U}_{\Sigma}^{\top} \otimes \mathbf{S}_{\Omega}^{\frac{1}{2}} \mathbf{U}_{\Omega}^{\top} \right),
\end{aligned} \tag{9}$$

where  $\tilde{\mathbf{C}} \otimes \tilde{\mathbf{R}} + \mathbf{I} \otimes \mathbf{I}$  is the projected covariance matrix  $\tilde{\mathbf{K}}$ .

At the slight cost of computing the eigenvalue decompositions of  $\Sigma$  and  $\Omega$ , we can now bring the log likelihood in a similar form as for multi-task GP regression with iid noise [2, 4]:

$$\begin{aligned}
\mathcal{L} &= -\frac{NT}{2} \ln(2\pi) - \frac{1}{2} \ln|\mathbf{K}| - \frac{1}{2} \text{vec} \mathbf{Y}^\top \mathbf{K}^{-1} \text{vec} \mathbf{Y} \\
&= -\frac{NT}{2} \ln(2\pi) - \ln \left| \left( \mathbf{U}_\Sigma \mathbf{S}_\Sigma^{\frac{1}{2}} \otimes \mathbf{U}_\Omega \mathbf{S}_\Omega^{\frac{1}{2}} \right) \tilde{\mathbf{K}} \left( \mathbf{S}_\Sigma^{\frac{1}{2}} \mathbf{U}_\Sigma^\top \otimes \mathbf{S}_\Omega^{\frac{1}{2}} \mathbf{U}_\Omega^\top \right) \right| \\
&\quad - \frac{1}{2} \text{vec} \mathbf{Y}^\top \left[ \left( \mathbf{U}_\Sigma \mathbf{S}_\Sigma^{\frac{1}{2}} \otimes \mathbf{U}_\Omega \mathbf{S}_\Omega^{\frac{1}{2}} \right) \tilde{\mathbf{K}} \left( \mathbf{S}_\Sigma^{\frac{1}{2}} \mathbf{U}_\Sigma^\top \otimes \mathbf{S}_\Omega^{\frac{1}{2}} \mathbf{U}_\Omega^\top \right) \right]^{-1} \text{vec} \mathbf{Y} \\
&= -\frac{NT}{2} \ln(2\pi) - \frac{1}{2} \ln |\mathbf{U}_\Sigma \mathbf{S}_\Sigma \mathbf{U}_\Sigma^\top \otimes \mathbf{U}_\Omega \mathbf{S}_\Omega \mathbf{U}_\Omega^\top| - \frac{1}{2} \ln |\tilde{\mathbf{K}}| \\
&\quad - \frac{1}{2} \text{vec} \mathbf{Y}^\top \left( \mathbf{U}_\Sigma \mathbf{S}_\Sigma^{-\frac{1}{2}} \otimes \mathbf{U}_\Omega \mathbf{S}_\Omega^{-\frac{1}{2}} \right) \tilde{\mathbf{K}}^{-1} \left( \mathbf{S}_\Sigma^{-\frac{1}{2}} \mathbf{U}_\Sigma^\top \otimes \mathbf{S}_\Omega^{-\frac{1}{2}} \mathbf{U}_\Omega^\top \right) \text{vec} \mathbf{Y} \\
&= -\frac{NT}{2} \ln(2\pi) - \ln |\mathbf{S}_\Sigma \otimes \mathbf{S}_\Omega| - \frac{1}{2} \ln |\tilde{\mathbf{K}}| \\
&\quad - \frac{1}{2} \left[ \left( \mathbf{S}_\Sigma^{-\frac{1}{2}} \mathbf{U}_\Sigma^\top \otimes \mathbf{S}_\Omega^{-\frac{1}{2}} \mathbf{U}_\Omega^\top \right) \text{vec} \mathbf{Y} \right]^\top \tilde{\mathbf{K}}^{-1} \left[ \left( \mathbf{S}_\Sigma^{-\frac{1}{2}} \mathbf{U}_\Sigma^\top \otimes \mathbf{S}_\Omega^{-\frac{1}{2}} \mathbf{U}_\Omega^\top \right) \text{vec} \mathbf{Y} \right] \\
&= -\frac{NT}{2} \ln(2\pi) - \ln |\mathbf{S}_\Sigma \otimes \mathbf{S}_\Omega| - \frac{1}{2} \ln |\tilde{\mathbf{K}}| \\
&\quad - \frac{1}{2} \text{vec} \left( \mathbf{S}_\Omega^{-\frac{1}{2}} \mathbf{U}_\Omega^\top \mathbf{Y} \mathbf{U}_\Sigma \mathbf{S}_\Sigma^{-\frac{1}{2}} \right)^\top \tilde{\mathbf{K}}^{-1} \text{vec} \left( \mathbf{S}_\Omega^{-\frac{1}{2}} \mathbf{U}_\Omega^\top \mathbf{Y} \mathbf{U}_\Sigma \mathbf{S}_\Sigma^{-\frac{1}{2}} \right) \\
&= -\frac{NT}{2} \ln(2\pi) - \frac{N}{2} \sum_{i=1}^T \ln \mathbf{S}_\Sigma[i, i] - \frac{T}{2} \sum_{j=1}^N \ln \mathbf{S}_\Omega[j, j] - \frac{1}{2} \ln |\tilde{\mathbf{K}}| - \frac{1}{2} \text{vec} \tilde{\mathbf{Y}}^\top \tilde{\mathbf{K}}^{-1} \text{vec} \tilde{\mathbf{Y}}
\end{aligned} \tag{10}$$

where  $\mathbf{S}_\Omega^{-\frac{1}{2}} \mathbf{U}_\Omega^\top \mathbf{Y} \mathbf{U}_\Sigma \mathbf{S}_\Sigma^{-\frac{1}{2}}$  is the projected outcome  $\tilde{\mathbf{Y}}$ . Computing the eigenvalue decompositions of  $\Sigma$  and  $\Omega$  takes  $O(N^3 + T^3)$  time, and transforming  $\mathbf{Y}$  to  $\tilde{\mathbf{Y}}$  takes  $O(N^2T + T^2N)$  time, since  $\mathbf{S}_\Omega, \mathbf{S}_\Sigma$  are diagonal.

Along similar lines as discussed for the iid case, we can now efficiently evaluate the marginal log likelihood:

$$\begin{aligned}
\mathcal{L} &= -\frac{NT}{2} \ln(2\pi) - \frac{N}{2} \sum_{i=1}^T \ln \mathbf{S}_\Sigma[i, i] - \frac{T}{2} \sum_{j=1}^N \ln \mathbf{S}_\Omega[j, j] - \frac{1}{2} \ln |\tilde{\mathbf{K}}| - \frac{1}{2} \text{vec} \tilde{\mathbf{Y}}^\top \tilde{\mathbf{K}}^{-1} \text{vec} \tilde{\mathbf{Y}} \\
&= -\frac{NT}{2} \ln(2\pi) - \frac{N}{2} \sum_{i=1}^T \ln \mathbf{S}_\Sigma[i, i] - \frac{T}{2} \sum_{j=1}^N \ln \mathbf{S}_\Omega[j, j] - \frac{1}{2} \ln |\mathbf{S}_{\tilde{\mathbf{C}}} \otimes \mathbf{S}_{\tilde{\mathbf{R}}} + \mathbf{I} \otimes \mathbf{I}| \\
&\quad - \frac{1}{2} \left( \text{vec} \tilde{\mathbf{Y}} \right)^\top \left[ \left( \mathbf{U}_{\tilde{\mathbf{C}}} \otimes \mathbf{U}_{\tilde{\mathbf{R}}} \right) \left( \mathbf{S}_{\tilde{\mathbf{C}}} \otimes \mathbf{S}_{\tilde{\mathbf{R}}} + \mathbf{I} \right) \left( \mathbf{U}_{\tilde{\mathbf{C}}} \otimes \mathbf{U}_{\tilde{\mathbf{R}}} \right)^\top \right]^{-1} \text{vec} \tilde{\mathbf{Y}} \\
&= -\frac{NT}{2} \ln(2\pi) - \frac{N}{2} \sum_{i=1}^T \ln \mathbf{S}_\Sigma[i, i] - \frac{T}{2} \sum_{j=1}^N \ln \mathbf{S}_\Omega[j, j] - \frac{1}{2} \ln |\mathbf{S}_{\tilde{\mathbf{C}}} \otimes \mathbf{S}_{\tilde{\mathbf{R}}} + \mathbf{I} \otimes \mathbf{I}| \\
&\quad - \frac{1}{2} \left[ \left( \mathbf{U}_{\tilde{\mathbf{C}}}^\top \otimes \mathbf{U}_{\tilde{\mathbf{R}}}^\top \right) \text{vec} \tilde{\mathbf{Y}} \right]^\top \left( \mathbf{S}_{\tilde{\mathbf{C}}} \otimes \mathbf{S}_{\tilde{\mathbf{R}}} + \mathbf{I} \right)^{-1} \left[ \left( \mathbf{U}_{\tilde{\mathbf{C}}}^\top \otimes \mathbf{U}_{\tilde{\mathbf{R}}}^\top \right) \text{vec} \tilde{\mathbf{Y}} \right] \\
&= -\frac{NT}{2} \ln(2\pi) - \frac{N}{2} \sum_{i=1}^T \ln \mathbf{S}_\Sigma[i, i] - \frac{T}{2} \sum_{j=1}^N \ln \mathbf{S}_\Omega[j, j] - \frac{1}{2} \sum_{i=1}^T \sum_{j=1}^N (\mathbf{S}_{\tilde{\mathbf{C}}}[i, i] \mathbf{S}_{\tilde{\mathbf{R}}}[j, j] + 1) \\
&\quad - \frac{1}{2} \left( \mathbf{U}_{\tilde{\mathbf{R}}}^\top \tilde{\mathbf{Y}} \mathbf{U}_{\tilde{\mathbf{C}}} \right)^\top \left( \mathbf{S}_{\tilde{\mathbf{C}}} \otimes \mathbf{S}_{\tilde{\mathbf{R}}} + \mathbf{I} \right)^{-1} \text{vec} \left( \mathbf{U}_{\tilde{\mathbf{R}}}^\top \tilde{\mathbf{Y}} \mathbf{U}_{\tilde{\mathbf{C}}} \right)
\end{aligned} \tag{11}$$

$$\tag{12}$$

In line (11), we exploit the fact that the eigenvalue decomposition of  $\tilde{\mathbf{K}}$  can be recovered by the eigenvalue decompositions of  $\tilde{\Sigma}$  and  $\tilde{\Omega}$ . Computing these decompositions takes  $O(N^3 + T^3)$  time, the log determinant can then be computed in  $O(NT)$  time and the squared form in  $O(N^2T + NT^2)$  time since  $\mathbf{S}_{\tilde{\mathbf{C}}}, \mathbf{S}_{\tilde{\mathbf{R}}}$  are diagonal.

## Efficient gradient evaluation

[illegible]

where  $(\mathbf{S}_{\hat{\mathbf{C}}} \otimes \mathbf{S}_{\hat{\mathbf{R}}} + \mathbf{I})^{-1} (\mathbf{U}_{\hat{\mathbf{C}}}^{\top} \otimes \mathbf{U}_{\hat{\mathbf{R}}}^{\top}) \text{vec} \tilde{\mathbf{Y}} = (\mathbf{S}_{\hat{\mathbf{C}}} \otimes \mathbf{S}_{\hat{\mathbf{R}}} + \mathbf{I})^{-1} \text{vec} (\mathbf{U}_{\hat{\mathbf{R}}}^{\top} \tilde{\mathbf{Y}} \mathbf{U}_{\hat{\mathbf{C}}})$  is  $\hat{\mathbf{Y}}$ .

### Efficient prediction

$$\begin{aligned}
\mathbf{m}^* &= (\mathbf{C} \otimes \mathbf{R}^*) (\mathbf{C} \otimes \mathbf{R} + \boldsymbol{\Sigma} \otimes \mathbf{I})^{-1} \text{vec} \mathbf{Y} \\
&= (\mathbf{C} \otimes \mathbf{R}^*) \left[ \left( \mathbf{U}_\Sigma \mathbf{S}_\Sigma^{\frac{1}{2}} \otimes \mathbf{U}_\Omega \mathbf{S}_\Omega^{\frac{1}{2}} \right) \tilde{\mathbf{K}} \left( \mathbf{S}_\Sigma^{\frac{1}{2}} \mathbf{U}_\Sigma^\top \otimes \mathbf{S}_\Omega^{\frac{1}{2}} \mathbf{U}_\Omega^\top \right) \right]^{-1} \text{vec} \mathbf{Y} \\
&= (\mathbf{C} \otimes \mathbf{R}^*) \left( \mathbf{U}_\Sigma \mathbf{S}_\Sigma^{-\frac{1}{2}} \otimes \mathbf{U}_\Omega \mathbf{S}_\Omega^{-\frac{1}{2}} \right) \tilde{\mathbf{K}}^{-1} \left( \mathbf{S}_\Sigma^{-\frac{1}{2}} \mathbf{U}_\Sigma^\top \otimes \mathbf{S}_\Omega^{-\frac{1}{2}} \mathbf{U}_\Omega^\top \right) \text{vec} \mathbf{Y} \\
&= \left( \mathbf{C} \mathbf{U}_\Sigma \mathbf{S}_\Sigma^{-\frac{1}{2}} \otimes \mathbf{R}^* \mathbf{U}_\Omega \mathbf{S}_\Omega^{-\frac{1}{2}} \right) \tilde{\mathbf{K}}^{-1} \text{vec} \left( \left( \mathbf{S}_\Sigma^{-\frac{1}{2}} \mathbf{U}_\Sigma^\top \right) \mathbf{Y} \left( \mathbf{U}_\Sigma \mathbf{S}_\Sigma^{-\frac{1}{2}} \right) \right) \\
&= \left( \mathbf{C} \mathbf{U}_\Sigma \mathbf{S}_\Sigma^{-\frac{1}{2}} \otimes \mathbf{R}^* \mathbf{U}_\Omega \mathbf{S}_\Omega^{-\frac{1}{2}} \right) \left( \tilde{\mathbf{K}}^{-1} \text{vec} \tilde{\mathbf{Y}} \right) \\
&= \left( \mathbf{C} \mathbf{U}_\Sigma \mathbf{S}_\Sigma^{-\frac{1}{2}} \otimes \mathbf{R}^* \mathbf{U}_\Omega \mathbf{S}_\Omega^{-\frac{1}{2}} \right) \text{vec} \left( \mathbf{U}_{\hat{\mathbf{R}}} \hat{\mathbf{Y}} \mathbf{U}_{\hat{\mathbf{C}}}^\top \right) \\
&= \text{vec} \left( \left( \mathbf{R}^* \mathbf{U}_\Omega \mathbf{S}_\Omega^{-\frac{1}{2}} \right) \left( \mathbf{U}_{\hat{\mathbf{R}}} \hat{\mathbf{Y}} \mathbf{U}_{\hat{\mathbf{C}}}^\top \right) \left( \mathbf{C} \mathbf{U}_\Sigma \mathbf{S}_\Sigma^{-\frac{1}{2}} \right)^\top \right) \\
&= \text{vec} \left( \mathbf{R}^* \mathbf{U}_\Omega \mathbf{S}_\Omega^{-\frac{1}{2}} \mathbf{U}_{\hat{\mathbf{R}}} \hat{\mathbf{Y}} \mathbf{U}_{\hat{\mathbf{C}}}^\top \mathbf{S}_\Sigma^{-\frac{1}{2}} \mathbf{U}_\Sigma^\top \mathbf{C}^\top \right) \tag{14}
\end{aligned}$$

### References

- [1] Dennis S. Bernstein. *Matrix mathematics : theory, facts, and formulas*. Princeton University Press, Princeton, N.J., Woodstock, 2009.
- [2] Edwin V. Bonilla, Kian Ming Adam Chai, and Christopher K. I. Williams. Multi-task gaussian process prediction. In *NIPS*, 2007.
- [3] Alfredo A. Kalaitzis and Neil D. Lawrence. Residual components analysis. In *ICML*, 2012.
- [4] Oliver Stegle, Christoph Lippert, Joris M. Mooij, Neil D. Lawrence, and Karsten M. Borgwardt. Efficient inference in matrix-variate gaussian models with iid observation noise. In *NIPS*, pages 630–638, 2011.
